# Supplementary material
Source: PubMed Central journal article supplement (PMC5869151)

## Supporting information

**Table S1:** Nano LC-MS/MS analysis of all bands extracted from TMBZ gels with KF707 W.T. and mutant strains grown in MSM medium with glucose or biphenyl as the sole carbon source. The Uniprot accession number, amino acids coverage, significant peptide modifications and xCorr are listed.

|                      |                                                                        |                                                                                                                                                                                                                 |                           |                      |
|----------------------|------------------------------------------------------------------------|-----------------------------------------------------------------------------------------------------------------------------------------------------------------------------------------------------------------|---------------------------|----------------------|
| 17 kDa               | Accession                                                              | Description and % coverage                                                                                                                                                                                      |                           |                      |
|                      | L8MT74                                                                 | Cytochrome <i>c</i> <sub>4</sub> OS= <i>Pseudomonas pseudoalcaligenes</i> KF707 = NBRC 110670 GN=ppKF707C_770 PE=3 SV=1 – [L8MT74_PSEPS] – NCBI Cyt <i>c</i> <sub>4</sub> BAU71765 – <b>31.36%</b>              |                           |                      |
|                      | Sequence                                                               |                                                                                                                                                                                                                 | Modification              | XCorr                |
|                      | DIEAVSSYIQGLH<br>AAVcGAcHGPDGNSAAPNFPK<br>TVLEmTGLLTNmSDQDmADLAAYFASQK |                                                                                                                                                                                                                 | C4 – C7<br>M5 – M12 – M17 | 4.76<br>4.31<br>4.27 |
| 22 kDa               | Accession                                                              | Description and % coverage                                                                                                                                                                                      |                           |                      |
|                      | L8MRV9                                                                 | <i>cbb</i> <sub>3</sub> -type cytochrome <i>c</i> oxidase subunit OS= <i>Pseudomonas pseudoalcaligenes</i> KF707 = NBRC 110670 GN=ppKF707_18660 PE=4 SV=1 – [L8MRV9_PSEPS] _NCBI CcoO1 BAU7355 - <b>4 4.39%</b> |                           |                      |
|                      | Sequence                                                               |                                                                                                                                                                                                                 | Modification              | XCorr                |
|                      | YGHYSVAGESVWDHPFLWGSK                                                  |                                                                                                                                                                                                                 |                           | 6.88                 |
|                      | TEmDALVAYLQVLGTAIK                                                     |                                                                                                                                                                                                                 |                           | 4.94                 |
|                      | mPSYPWLVENK                                                            |                                                                                                                                                                                                                 |                           | 3.76                 |
|                      | TALELEGR                                                               |                                                                                                                                                                                                                 | M3                        | 2.96                 |
| GKTEmDALVAYLQVLGTAIK |                                                                        | M1                                                                                                                                                                                                              | 2.95                      |                      |
| KLGVPYTDDDIAGAR      |                                                                        | M5                                                                                                                                                                                                              | 2.86                      |                      |
| LGVPYTDDDIAGAR       |                                                                        |                                                                                                                                                                                                                 | 2.71                      |                      |
| YSDDWHR              |                                                                        |                                                                                                                                                                                                                 | 2.03                      |                      |
| 22 kDa               | Accession                                                              | Description and % coverage                                                                                                                                                                                      |                           |                      |
|                      | L8MLE9                                                                 | <i>cbb</i> <sub>3</sub> -type cytochrome <i>c</i> oxidase subunit OS= <i>Pseudomonas pseudoalcaligenes</i> KF707 = NBRC 110670 GN=ppKF707_18700 PE=4 SV=1 – [L8MLE8_PSEPS] _NCBI CcoO2 BAU73558 - <b>44.33%</b> |                           |                      |
|                      | Sequence                                                               |                                                                                                                                                                                                                 | Modification              | XCorr                |

|        |                                                                                                                                                                                                                                                                                                                        |                                                                                                                                                                                                                                                        |                                                                                                                              |
|--------|------------------------------------------------------------------------------------------------------------------------------------------------------------------------------------------------------------------------------------------------------------------------------------------------------------------------|--------------------------------------------------------------------------------------------------------------------------------------------------------------------------------------------------------------------------------------------------------|------------------------------------------------------------------------------------------------------------------------------|
|        | YGHYSVAGESVWDHPFLWGSK<br>ALQTLGVPYSEDDVAGAQAQAVK<br>mPAYPWLVENTLDGKDAAK<br>TEmDALVAYLQVLGTAVK<br>GKTEmDALVAYLQVLGTAVK<br>mPAYPWLVENTLDGK<br>YSDDWHR                                                                                                                                                                    | M1<br>M3<br>M5<br>M1                                                                                                                                                                                                                                   | 6.88<br>5.44<br>5.12<br>4.62<br>4.37<br>3.07<br>2.03                                                                         |
| 29 kDa | Accession                                                                                                                                                                                                                                                                                                              | Description and % coverage                                                                                                                                                                                                                             |                                                                                                                              |
|        | L8M8C7                                                                                                                                                                                                                                                                                                                 | Ubiquinol cytochrome <i>c</i> oxidoreductase, cytochrome <i>c</i> <sub>1</sub> subunit OS= <i>Pseudomonas pseudoalcaligenes</i> KF707 NBRC 110670 GN=ppKF707_9870 PE=4 SV=1 – [L8M8C7_PSEPS] – NCBI Cyt <i>c</i> <sub>1</sub> BAU72675 - <b>37.07%</b> |                                                                                                                              |
|        | Sequence                                                                                                                                                                                                                                                                                                               | Modification                                                                                                                                                                                                                                           | XCorr                                                                                                                        |
|        | DLGIPEELmmENLVFTGAK<br>IQNLVTFLAYSALPVK<br>VFPNVGmPNVLVSLQGR<br>TWFGAAPPDLTLVAR<br>VRGNDWLYSYLR<br>GNDWLYSYLR<br>LTEAEFDEK                                                                                                                                                                                             | M9 – M10<br>M7                                                                                                                                                                                                                                         | 3.64<br>3.28<br>3.03<br>2.89<br>2.81<br>2.71<br>2.12                                                                         |
| 34 kDa | Accession                                                                                                                                                                                                                                                                                                              | Description and % coverage                                                                                                                                                                                                                             |                                                                                                                              |
|        | L8MQP2                                                                                                                                                                                                                                                                                                                 | <i>cbb</i> <sub>3</sub> -type cytochrome <i>c</i> oxidase subunit OS= <i>Pseudomonas pseudoalcaligenes</i> KF707 = NBRC 110670 GN=ppKF707C_18680 PE=3 SV=1 – [L8MQP2_PSEPS] – NCBI CcoP2 BAU73559 - <b>52.41%</b>                                      |                                                                                                                              |
|        | Sequence                                                                                                                                                                                                                                                                                                               | Modification                                                                                                                                                                                                                                           | XCorr                                                                                                                        |
|        | mAAmPAWGEILGDSGVR<br>VHILAAVYVYSLSHK<br>LPEGAQADLEAGK<br>EVDKAEQQYGPIFAR<br>QDLAGLKLPEGAQADLEAGK<br>GLFPGYADGWTQVAQWQR<br>NGQmPAQLEYLGEDK<br>GAmGFPNLTGDWR<br>AEQQYGPIFAR<br>LPEGAQADLEAGKK<br>GPTDQTmGHAFDGIEEYDNPLPK<br>mAAMP AWGEILGDSGVR<br>WGGAPDAIR<br>YSAmSVEEVAK<br>QDLAGLKLPEGAQADLEAGKK<br>YSAMSVEEVAKDPSAmK | M1 – M2<br>M3<br>M2<br>M7<br>M1<br>M4<br>M16                                                                                                                                                                                                           | 4.25<br>3.69<br>3.65<br>3.63<br>3.39<br>3.37<br>3.27<br>3.10<br>3.05<br>2.96<br>2.88<br>2.77<br>2.58<br>2.46<br>2.35<br>2.29 |
| 35 kDa | Accession                                                                                                                                                                                                                                                                                                              | Description and % coverage                                                                                                                                                                                                                             |                                                                                                                              |

|        |                       |                                                                                                                                                                                                                  |               |       |
|--------|-----------------------|------------------------------------------------------------------------------------------------------------------------------------------------------------------------------------------------------------------|---------------|-------|
|        | <b>L8MMN9</b>         | <i>ccb<sub>3</sub></i> -type cytochrome <i>c</i> oxidase subunit OS= <i>Pseudomonas pseudoalcaligenes</i> KF707 = NBRC 110670 GN=ppKF707C_18640 PE=3 SV=1 – [L8MMN9_PSEPS] – NCBI CcoP1 BAU73555 - <b>46,30%</b> |               |       |
|        |                       | Sequence                                                                                                                                                                                                         | Modification  | XCorr |
|        |                       | VHLLAAYVYLSQKPAEAGEAK                                                                                                                                                                                            |               | 5.69  |
|        |                       | GTPAmGAPNLTHPSAFIYGSSFAQLQQTIR                                                                                                                                                                                   |               | 4.68  |
|        |                       | QGVmPAQENILGNDK                                                                                                                                                                                                  | M5            | 3.13  |
|        |                       | GAYGFPNLTDNDWR                                                                                                                                                                                                   | M4            | 2.70  |
|        |                       | QESTEETVGHSDGIEEYDNPLPK                                                                                                                                                                                          | M4            | 2.58  |
|        |                       | HGVmPAWGEVLGEQGVR                                                                                                                                                                                                | M4            | 2.46  |
|        |                       | ADKQYGPIFAK                                                                                                                                                                                                      |               | 2.33  |
|        |                       | YAAmPIEEVAKDPQALK                                                                                                                                                                                                |               | 2.31  |
|        | QYGPIFAK              |                                                                                                                                                                                                                  | 2.07          |       |
| 37 kDa | Accession             | Description and % coverage                                                                                                                                                                                       |               |       |
|        | <b>L8MR96</b>         | Cytochrome <i>c</i> oxidase subunit OS= <i>Pseudomonas pseudoalcaligenes</i> KF707 = NBRC 110670 GN=ppKF707C_5503 PE=3 SV=1 – [L8MR96_PSEPS] – NCBI CoxII BAU71737 - <b>38,7%</b>                                |               |       |
|        |                       | Sequence                                                                                                                                                                                                         | Modification  | XCorr |
|        |                       | YLGdqEFFSNLAtPSEQIHnk                                                                                                                                                                                            |               | 5.73  |
|        |                       | ADHLNIVFHgKPGTsmAAFGK                                                                                                                                                                                            |               | 5.43  |
|        |                       | DEHYLLEVDQPLVVPVGTK                                                                                                                                                                                              |               | 5.40  |
|        |                       | ALTDKEWTLDELVAR                                                                                                                                                                                                  |               | 5.12  |
|        |                       | ADHLNIVFHgKPGTsmAAFGK                                                                                                                                                                                            | M16           | 4.79  |
|        |                       | APKDEHYLLEVDQPLVVPVGTK                                                                                                                                                                                           | C3 – C7 – M14 | 4.75  |
|        |                       | KDAIPGFVNESWTR                                                                                                                                                                                                   | M14           | 4.17  |
|        | LKELTDKEWTLDELVAR     | M5                                                                                                                                                                                                               | 4.16          |       |
|        | GQcTElcGKDHGFmPIVVEAK | M10                                                                                                                                                                                                              | 4.10          |       |
|        | DHGFmPIVVEAK          |                                                                                                                                                                                                                  | 3.74          |       |
|        | NAWGNNTGDmVTPK        |                                                                                                                                                                                                                  | 3.23          |       |
|        | EVLALKQAESQ           |                                                                                                                                                                                                                  | 3.00          |       |
|        | EWTLDELVAR            |                                                                                                                                                                                                                  | 2.96          |       |
|        | GQcTElcGK             |                                                                                                                                                                                                                  | 2.18          |       |

**Figure S1:** Nano *LC-MS/MS* fragmentation spectra found in the 37 kDa band, from cells grown with glucose (**A**) or with biphenyl (**B**), and belonging to CoxII subunit, Caa<sub>3</sub> SU IIc.

**A****ELTDKEWTLDELVAR**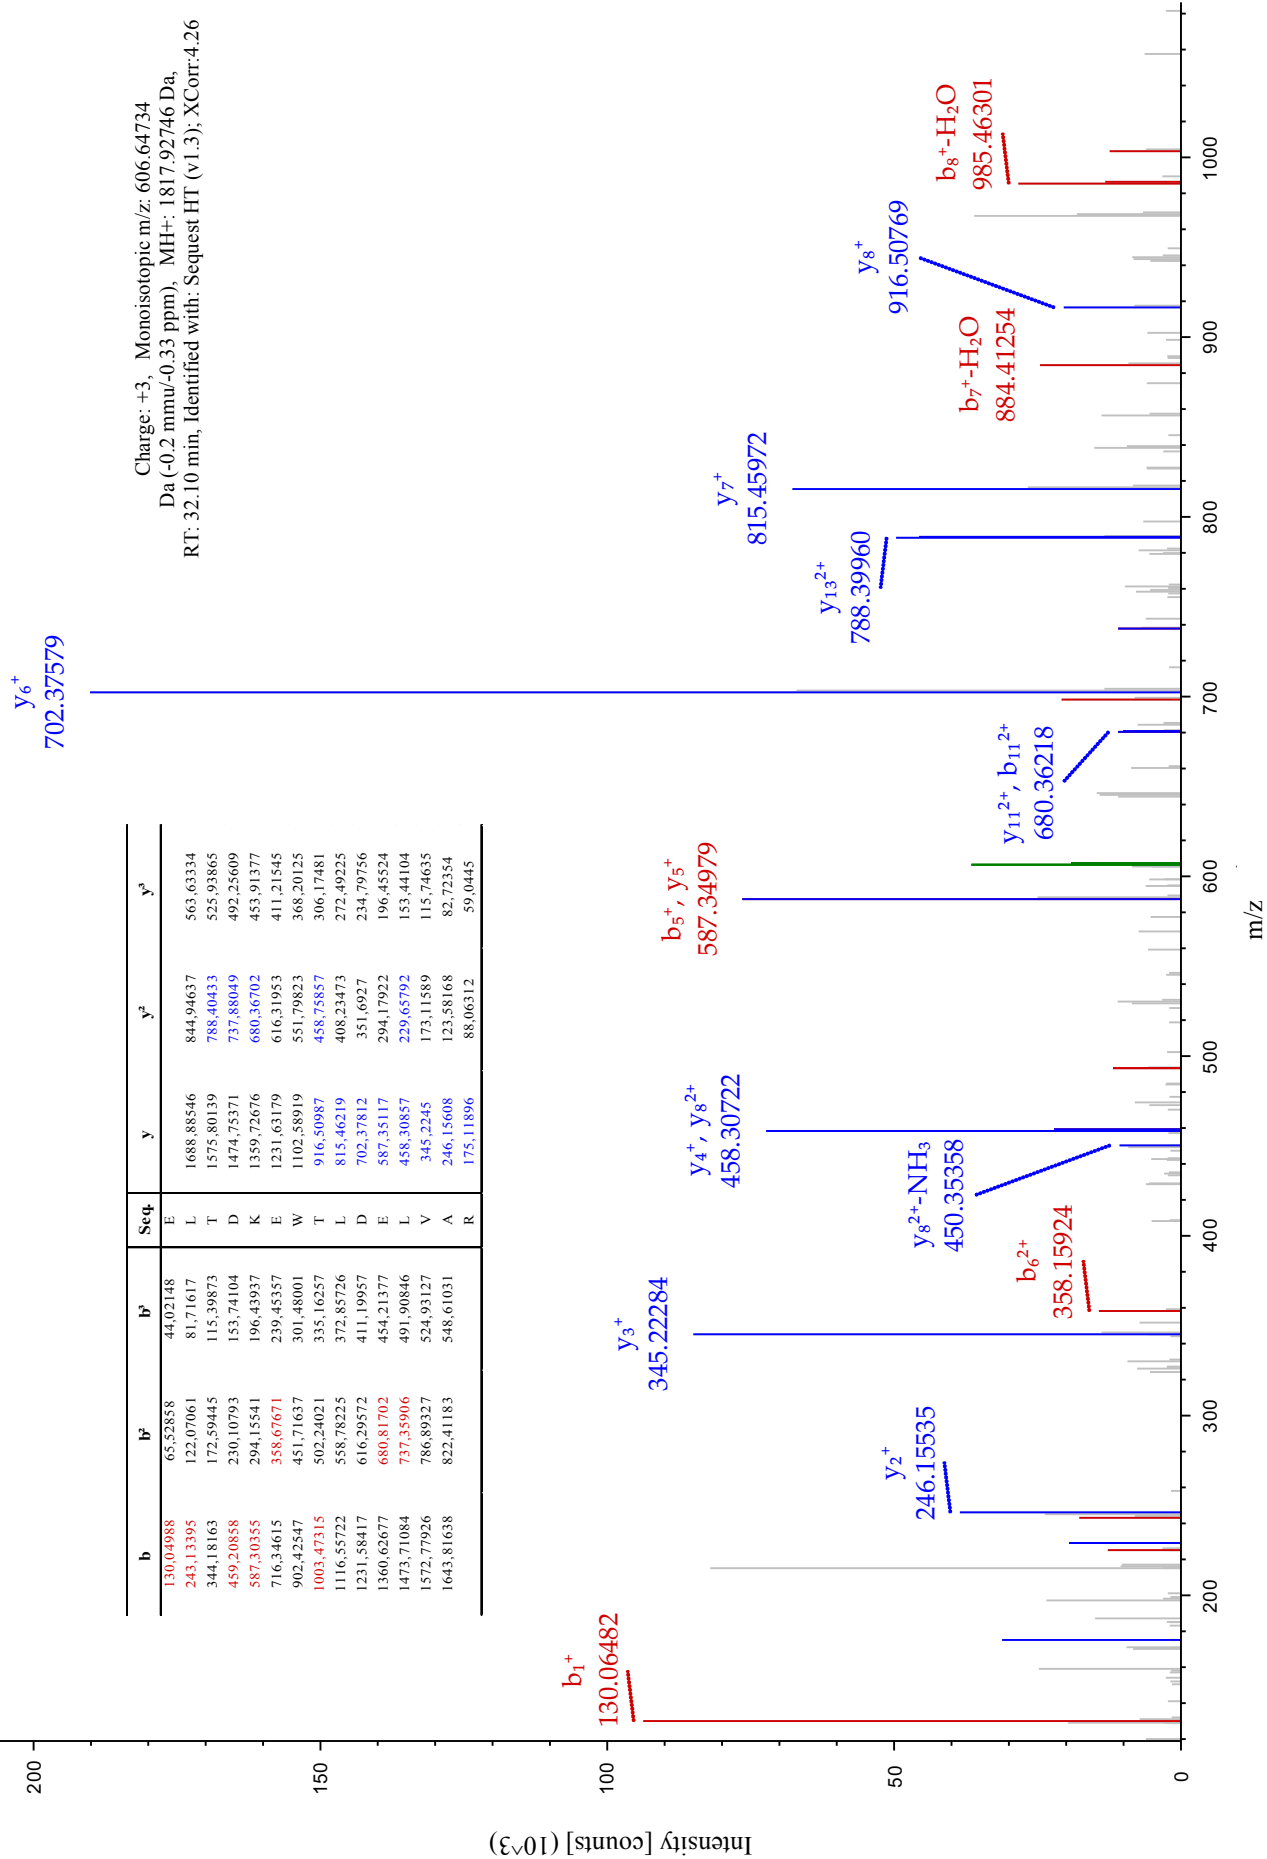

# DEHYLLEVDQPLVVPVGTK

| b          | b <sup>+</sup> | b <sup>2+</sup> | b <sup>3+</sup> | Seq        | y          | y <sup>2+</sup> | y <sup>3+</sup> |
|------------|----------------|-----------------|-----------------|------------|------------|-----------------|-----------------|
| 116.03423  | 58.52075       | 39.34959        | D               | 2036.10635 | 1018.55681 | 679.37363       |                 |
| 245.07683  | 123.04205      | 82.36379        | E               | 1907.06375 | 954.03551  | 636.35943       |                 |
| 382.13574  | 191.57151      | 128.0501        | H               | 1770.00484 | 885.50606  | 590.67313       |                 |
| 545.19906  | 273.10317      | 182.40454       | Y               | 1606.94152 | 803.9744   | 536.31869       |                 |
| 658.28313  | 329.6452       | 220.09923       | L               | 1493.85745 | 747.43236  | 498.624         |                 |
| 771.3672   | 386.18724      | 257.79392       | L               | 1380.77338 | 690.89033  | 460.92931       |                 |
| 900.4098   | 450.70854      | 300.80812       | E               | 1251.73078 | 626.36903  | 417.91511       |                 |
| 999.47822  | 500.24275      | 333.83092       | D               | 1152.66236 | 576.83482  | 384.8923        |                 |
| 1114.50517 | 557.75622      | 372.17324       | Q               | 1037.63541 | 519.32134  | 346.54999       |                 |
| 1242.56375 | 621.78551      | 414.85943       | Q               | 909.57683  | 455.29205  | 303.86379       |                 |
| 1339.61652 | 670.3119       | 447.21036       | P               | 812.52406  | 406.76567  | 271.51287       |                 |
| 1452.70059 | 726.85393      | 484.90505       | L               | 699.43999  | 350.22363  | 233.81818       |                 |
| 1551.76901 | 776.38814      | 517.92785       | V               | 600.37157  | 300.68942  | 200.79537       |                 |
| 1650.83743 | 825.92235      | 550.95066       | V               | 501.30315  | 251.15521  | 167.77257       |                 |
| 1747.8902  | 874.44874      | 583.30158       | P               | 404.25038  | 202.62883  | 135.42164       |                 |
| 1846.95862 | 923.98295      | 616.32439       | V               | 305.18196  | 153.09462  | 102.39884       |                 |
| 1903.98009 | 952.49368      | 635.33155       | G               | 248.16049  | 124.58388  | 83.39168        |                 |
| 2005.02777 | 1003.01752     | 669.01411       | K               | 147.11281  | 74.06004   | 49.70912        |                 |

Charge: +3, Monoisotopic m/z: 717.71490  
 Da (-1.05 mmu/-1.46 ppm), MH<sup>+</sup>: 2151.13016 Da,  
 RT: 32.80 min, Identified with: Sequest HT (v1.3); XCorr:4.13

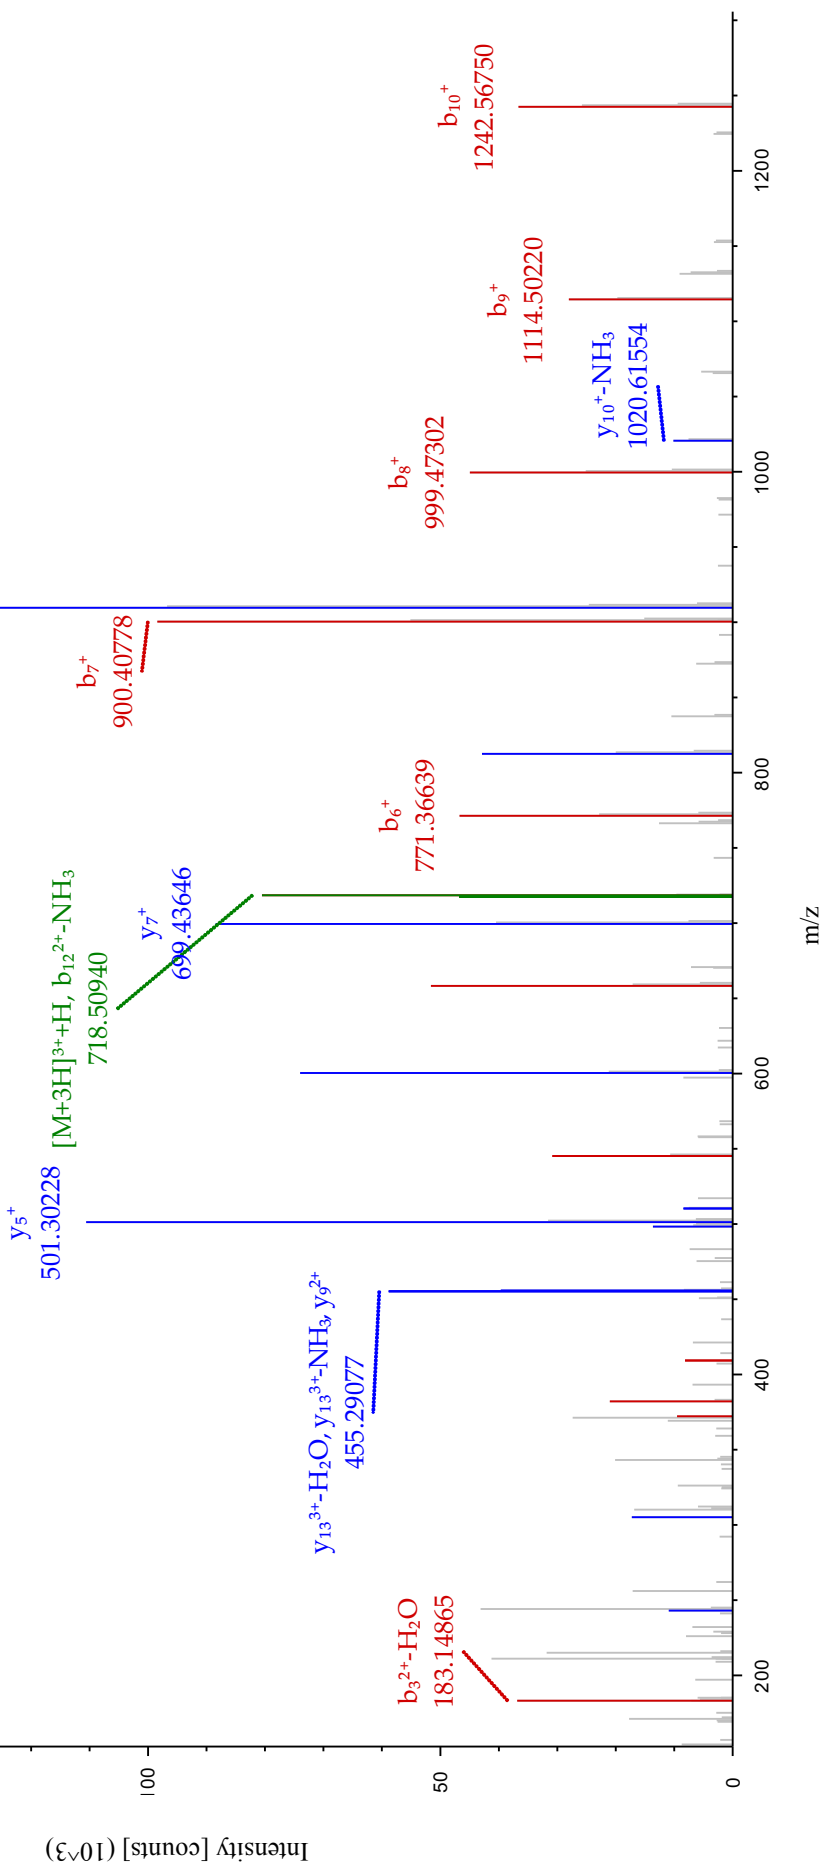

**DHGF<sup>+</sup>\*PIVVEAK**  
**M5-Oxidation (15.99492 Da)**

Charge: +2, Monoisotopic m/z: 679.84015  
 Da (-2.18 mmu/-3.21 ppm), MH<sup>+</sup>: 1358.67302 Da,  
 RT: 23.06 min, Identified with: Sequest HT (v1.3); XCorr:3.36

| b          | b <sup>+</sup> | Seq         | y          | y <sup>2</sup> |
|------------|----------------|-------------|------------|----------------|
| 116,03423  | 58,52075       | D           | 1243,65043 | 622,32885      |
| 253,09314  | 127,05021      | H           | 1106,59152 | 553,7994       |
| 310,11461  | 155,56094      | G           | 1049,57005 | 525,28866      |
| 457,18303  | 229,09515      | F           | 902,50163  | 451,75445      |
| 604,21844  | 302,61286      | M-Oxidation | 755,46621  | 378,23674      |
| 701,27121  | 351,13924      | P           | 658,41344  | 329,71036      |
| 814,35528  | 407,68128      | I           | 545,29937  | 273,16832      |
| 913,4237   | 457,21549      | V           | 446,26095  | 223,63411      |
| 1012,49212 | 506,7497       | V           | 347,19253  | 174,0999       |
| 1141,53472 | 571,271        | E           | 218,14993  | 109,5786       |
| 1212,57184 | 606,78956      | A           | 147,11281  | 74,06004       |

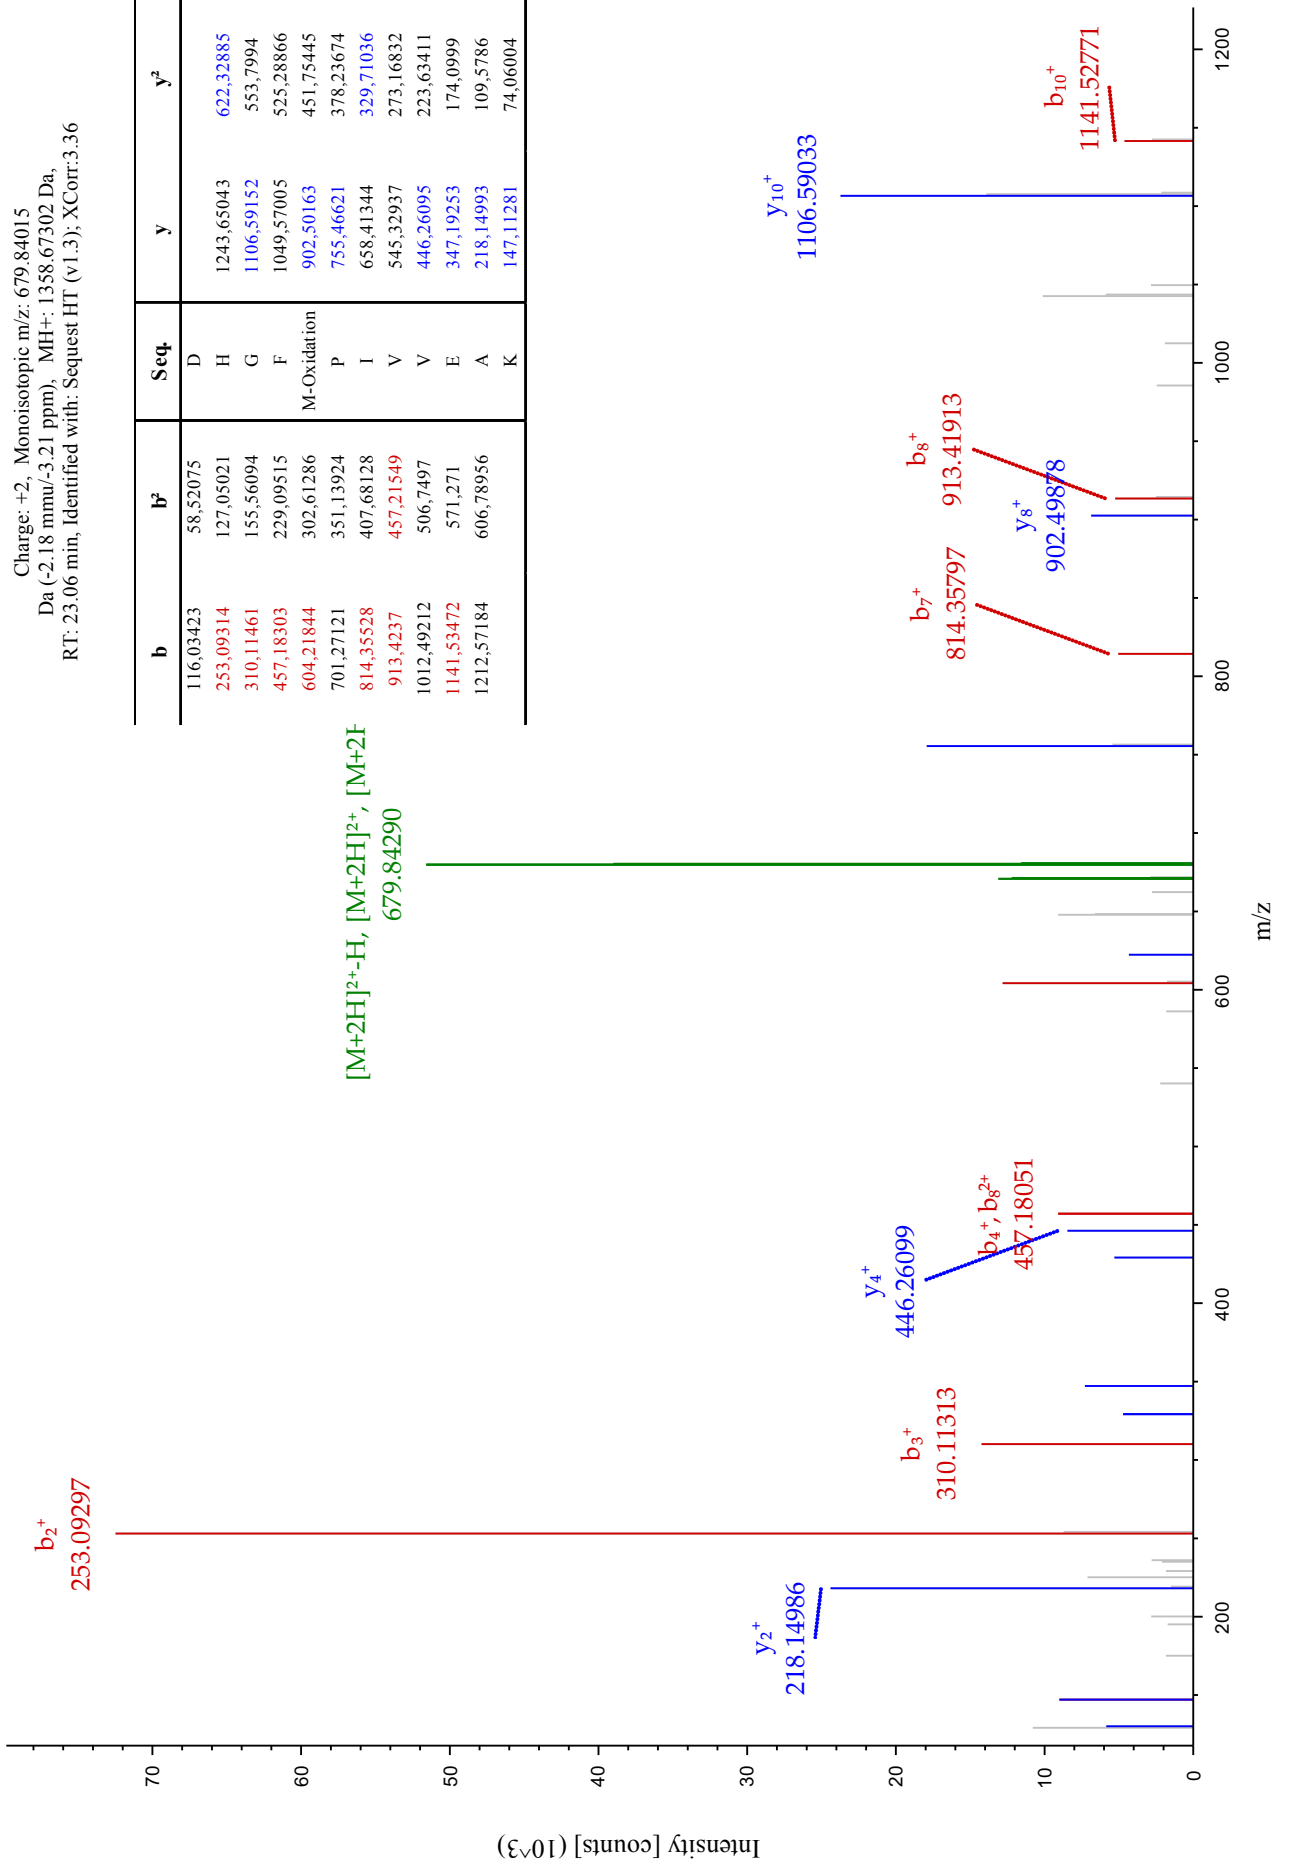

# YLGQDVEFFSNLATPSEQIHNK

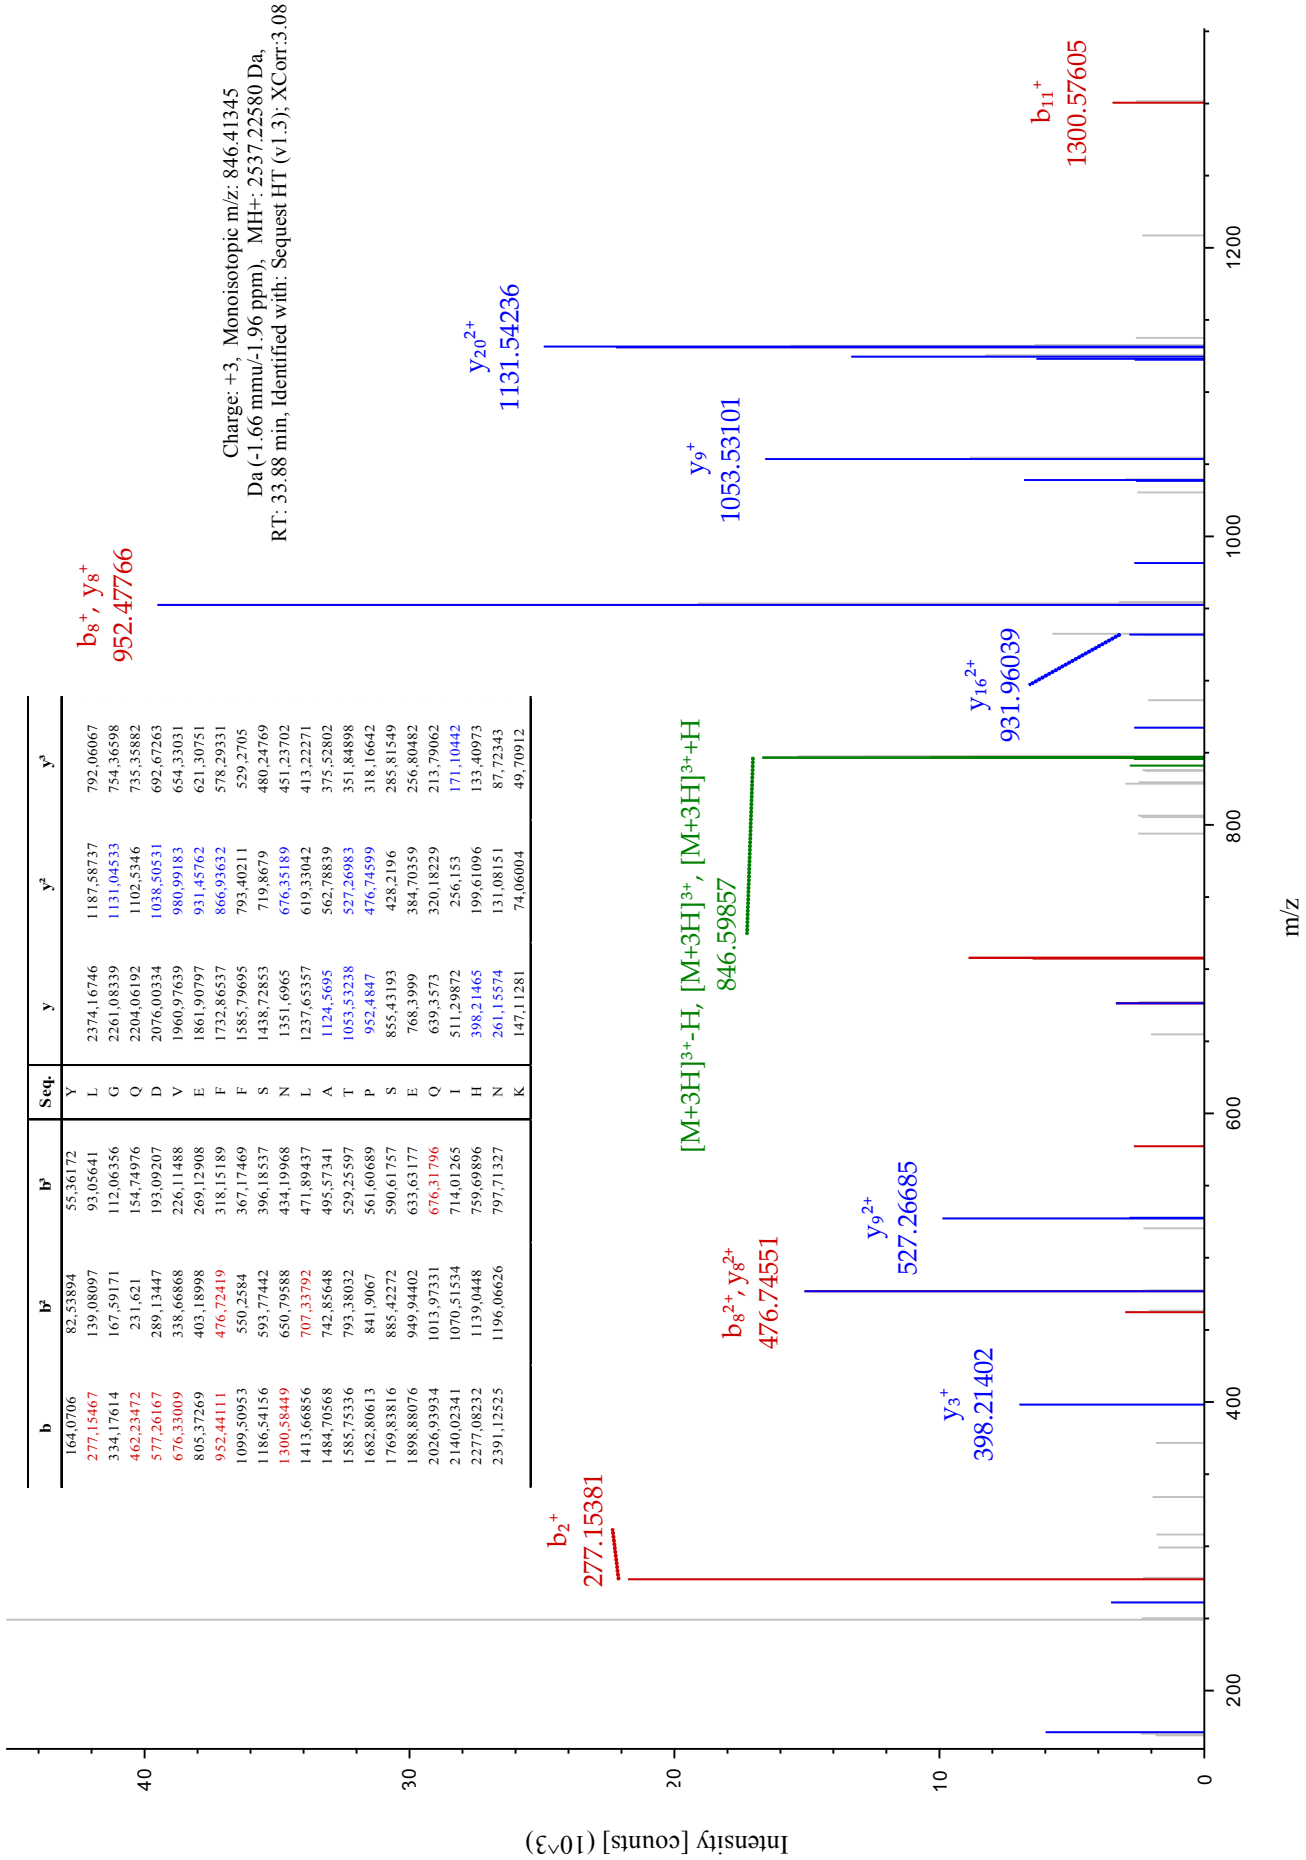



**ADHLNIVFHGKPGTSM\*AAFQK**  
\*M16-Oxidation (15.99492 Da)

**B**

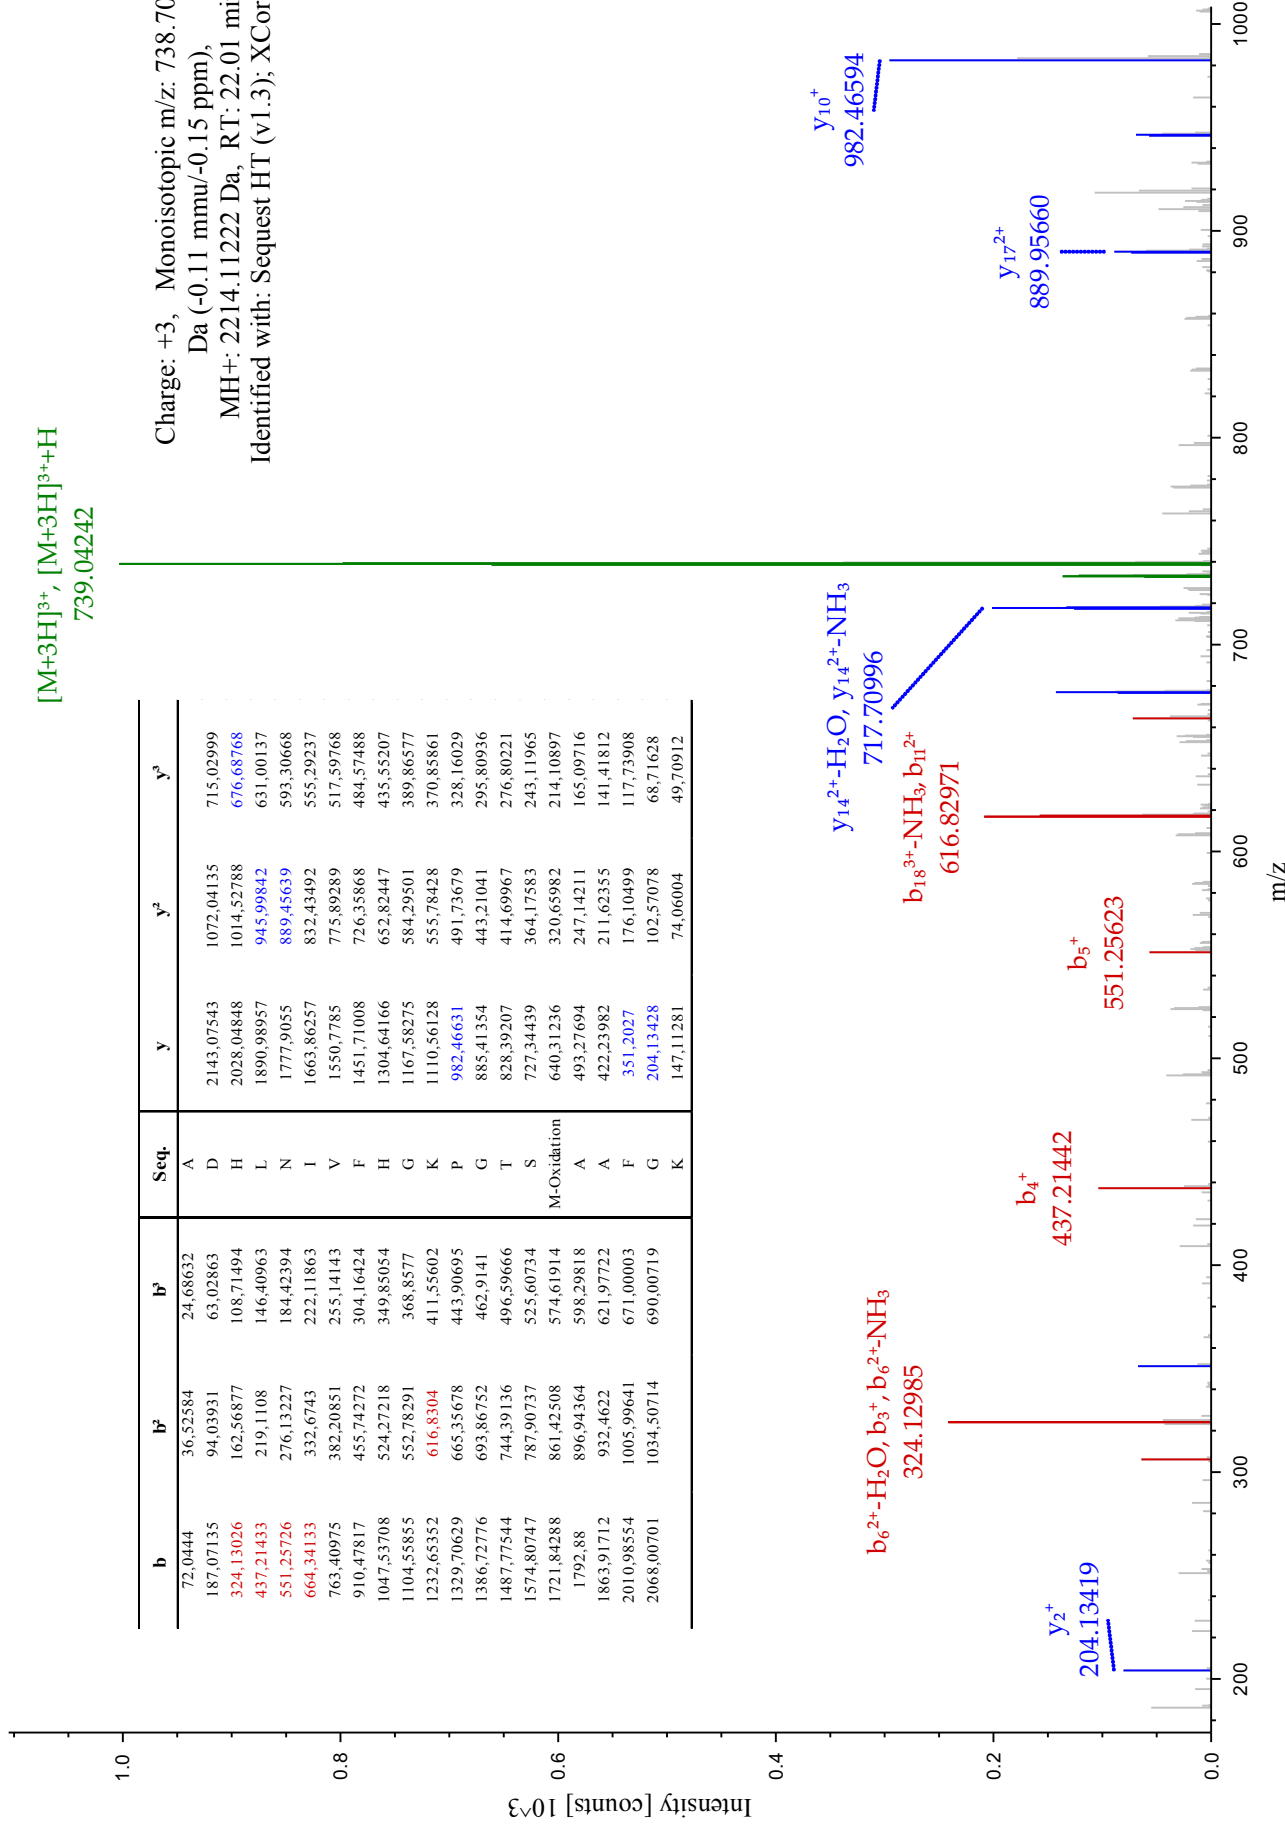

[M+3H]<sup>3+</sup>, [M+3H]<sup>3+</sup>+H  
739.04242

| b          | b <sup>2</sup> | b <sup>3</sup> | Seq.        | y          | y <sup>2</sup> | y <sup>3</sup> |
|------------|----------------|----------------|-------------|------------|----------------|----------------|
| 72.0444    | 36.52584       | 24.68632       | A           | 2143.07543 | 1072.04135     | 715.02999      |
| 187.07135  | 94.03931       | 63.02863       | D           | 2028.04848 | 1014.52788     | 676.68768      |
| 324.13026  | 162.56877      | 108.71494      | H           | 1890.98957 | 945.99842      | 631.00137      |
| 437.21433  | 219.1108       | 146.40963      | L           | 1777.9055  | 889.45639      | 593.30668      |
| 551.25726  | 276.13227      | 184.42394      | N           | 1663.86257 | 832.43492      | 555.29237      |
| 664.34133  | 332.6743       | 222.11863      | I           | 1550.7785  | 775.89289      | 517.59768      |
| 763.40975  | 382.20851      | 255.14143      | V           | 1451.71008 | 726.35868      | 484.57488      |
| 910.47817  | 455.74272      | 304.16424      | F           | 1304.64166 | 652.82447      | 435.55207      |
| 1047.53708 | 524.27218      | 349.85054      | H           | 1167.58275 | 584.29501      | 389.86577      |
| 1104.55855 | 552.78291      | 368.8577       | G           | 1110.56128 | 555.78428      | 370.85861      |
| 1232.65352 | 616.8304       | 411.55602      | K           | 982.46631  | 491.73679      | 328.16029      |
| 1329.70629 | 665.35678      | 443.90695      | P           | 885.41354  | 443.21041      | 295.80936      |
| 1386.72776 | 693.86752      | 462.9141       | T           | 828.39207  | 414.69967      | 276.80221      |
| 1487.77544 | 744.39136      | 496.59666      | G           | 727.34439  | 364.17583      | 243.11965      |
| 1574.80747 | 787.90737      | 525.60734      | S           | 640.31236  | 320.65982      | 214.10897      |
| 1721.84288 | 861.42508      | 574.61914      | M-Oxidation | 493.27694  | 247.14211      | 165.09716      |
| 1792.88    | 896.94364      | 598.29818      | A           | 422.23982  | 211.62355      | 141.41812      |
| 1863.91712 | 932.4622       | 621.97722      | A           | 351.2027   | 176.10499      | 117.73908      |
| 2010.98554 | 1005.99641     | 671.00003      | F           | 204.13428  | 102.57078      | 68.71628       |
| 2068.00701 | 1034.50714     | 690.000719     | G           | 147.11281  | 74.06004       | 49.70912       |
|            |                |                | K           |            |                |                |

Charge: +3, Monoisotopic m/z: 738.70892  
Da (-0.11 mmu/-0.15 ppm),  
MH+: 2214.11222 Da, RT: 22.01 min,  
Identified with: Sequest HT (v1.3); XCorr:5.43

# DEHYLLEVDQPLVVPVGTK

$[M+2H]^{2+}$ -H,  $[M+2H]^{2+}$ ,  $[M+2H]^{2+}$ +H  
1076.07117

Charge: +2, Monoisotopic m/z: 1076.07080  
Da (+0.51 mmu/+0.48 ppm),  
MH+: 2151.13432 Da, RT: 32.77 min,  
Identified with: Sequest HT (v1.3); XCorr:5.40

| b          | b <sup>+</sup> | Seq. | y          | y <sup>+</sup> |
|------------|----------------|------|------------|----------------|
| 116,03423  | 58,52075       | D    | 2036,10635 | 1018,55681     |
| 245,07683  | 123,04205      | E    | 1907,06375 | 954,03551      |
| 382,13574  | 191,57151      | H    | 1770,00484 | 885,50606      |
| 545,19906  | 273,10317      | Y    | 1606,94152 | 803,9744       |
| 658,28313  | 329,6452       | L    | 1493,85745 | 747,43236      |
| 771,3672   | 386,18724      | L    | 1380,77338 | 690,89033      |
| 900,4098   | 450,70854      | E    | 1251,73078 | 626,36903      |
| 999,47822  | 500,24275      | V    | 1152,66236 | 576,83482      |
| 1114,50517 | 557,75622      | D    | 1037,63541 | 519,32134      |
| 1242,56375 | 621,78551      | Q    | 909,57683  | 455,29205      |
| 1339,61652 | 670,3119       | P    | 812,52406  | 406,76567      |
| 1452,70059 | 726,85393      | L    | 699,43999  | 350,22363      |
| 1551,76901 | 776,38814      | V    | 600,37157  | 300,68942      |
| 1650,83743 | 825,92235      | V    | 501,30315  | 251,15521      |
| 1747,8902  | 874,44874      | P    | 404,25038  | 202,62883      |
| 1846,95862 | 923,98295      | V    | 305,18196  | 153,09462      |
| 1903,98009 | 952,49368      | G    | 248,16049  | 124,58388      |
| 2005,02777 | 1003,01752     | T    | 147,11281  | 74,06004       |

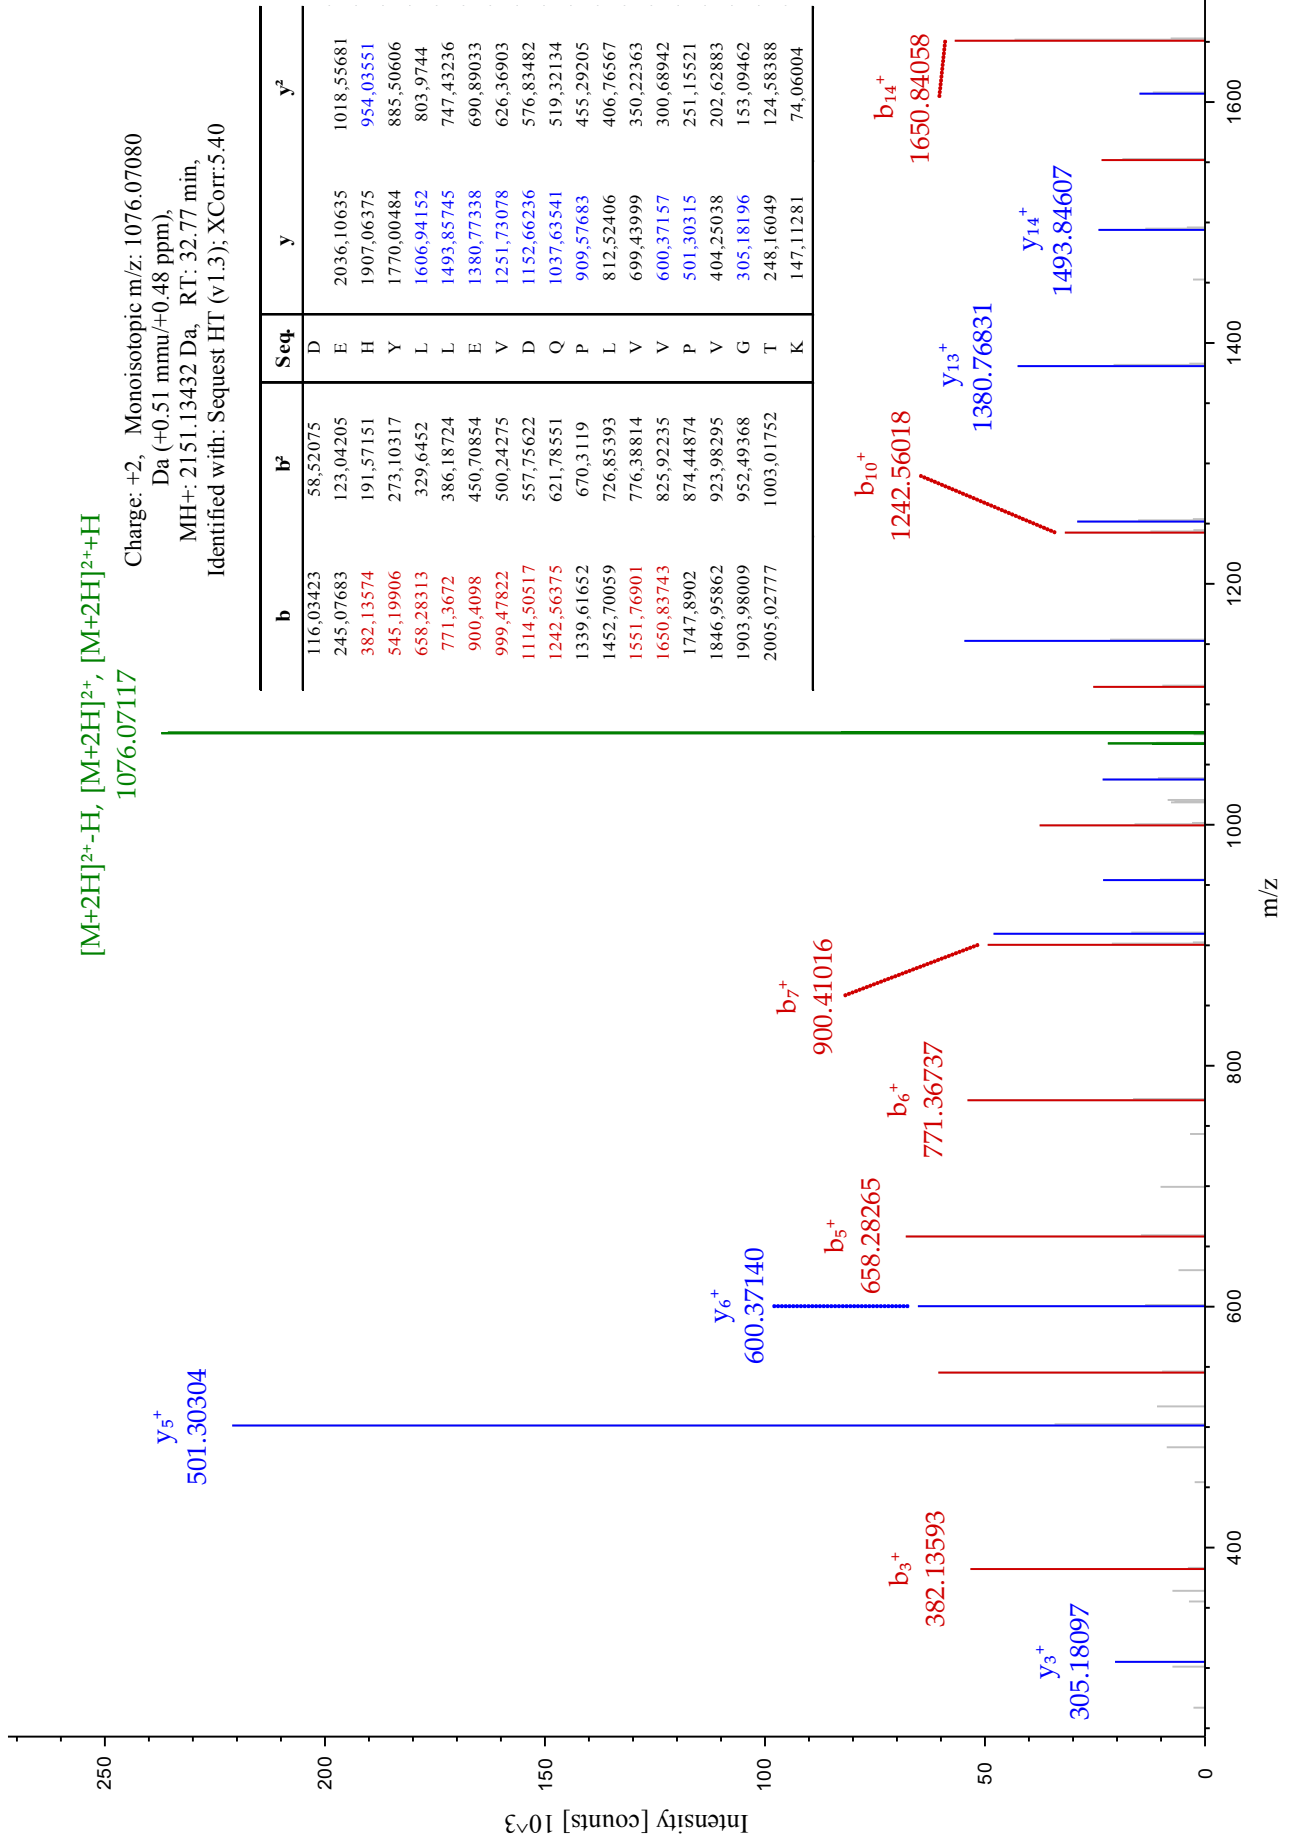

# ELTDKQWTLDELVA

$[M+2H]^{2+}$ ,  $[M+2H]^{2+}+H$   
909.96838

Charge: +2, Monoisotopic m/z: 909.46881  
Da (+1.14 mmu/+1.26 ppm),  
MH+: 1817.93035 Da, RT: 31.94 min,  
Identified with: Sequest HT (v1.3); XCorr: 5.12

| b          | b'        | Seq. | y          | y'        |
|------------|-----------|------|------------|-----------|
| 130,04988  | 65,52858  | E    | 1688,88546 | 844,94637 |
| 243,13395  | 122,07061 | L    | 1575,80139 | 788,40433 |
| 344,18163  | 172,59445 | T    | 1474,75371 | 737,88049 |
| 459,20858  | 230,10793 | D    | 1359,72676 | 680,36702 |
| 587,30355  | 294,15541 | K    | 1231,63179 | 616,31953 |
| 716,34615  | 358,67671 | E    | 1102,58919 | 551,79823 |
| 902,42547  | 451,71637 | W    | 916,50987  | 458,75857 |
| 1003,47315 | 502,24021 | T    | 815,46219  | 408,23473 |
| 1116,55722 | 558,78225 | L    | 702,37812  | 351,6927  |
| 1231,58417 | 616,29572 | D    | 587,35117  | 294,17922 |
| 1360,62677 | 680,81702 | E    | 458,30857  | 229,65792 |
| 1473,71084 | 737,35906 | L    | 345,2245   | 173,11589 |
| 1572,77926 | 786,89327 | V    | 246,15608  | 123,58168 |
| 1643,81638 | 822,41183 | A    | 175,11896  | 88,06312  |
|            |           | R    |            |           |

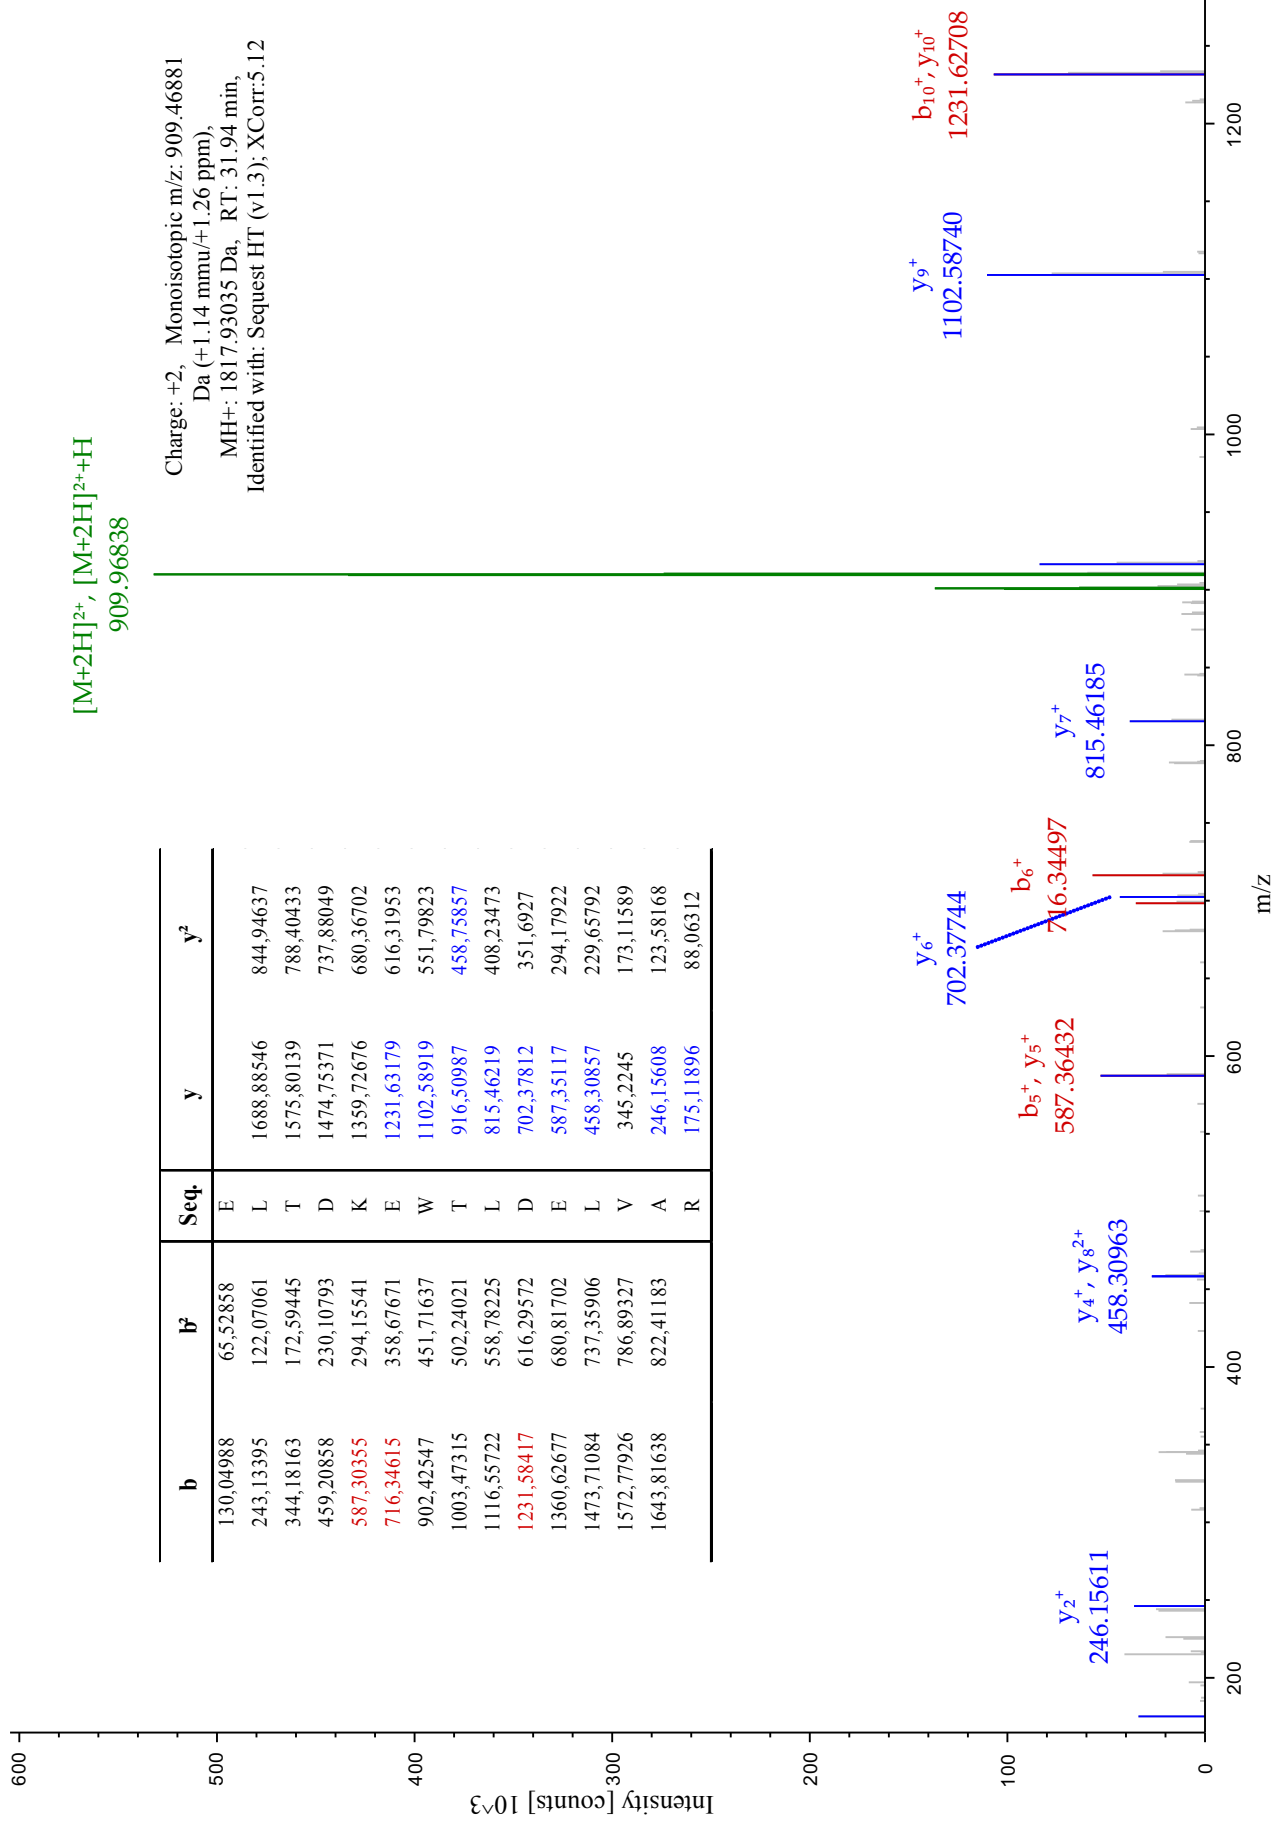

# APKDEHYLLEVDQPLVVPVGTK

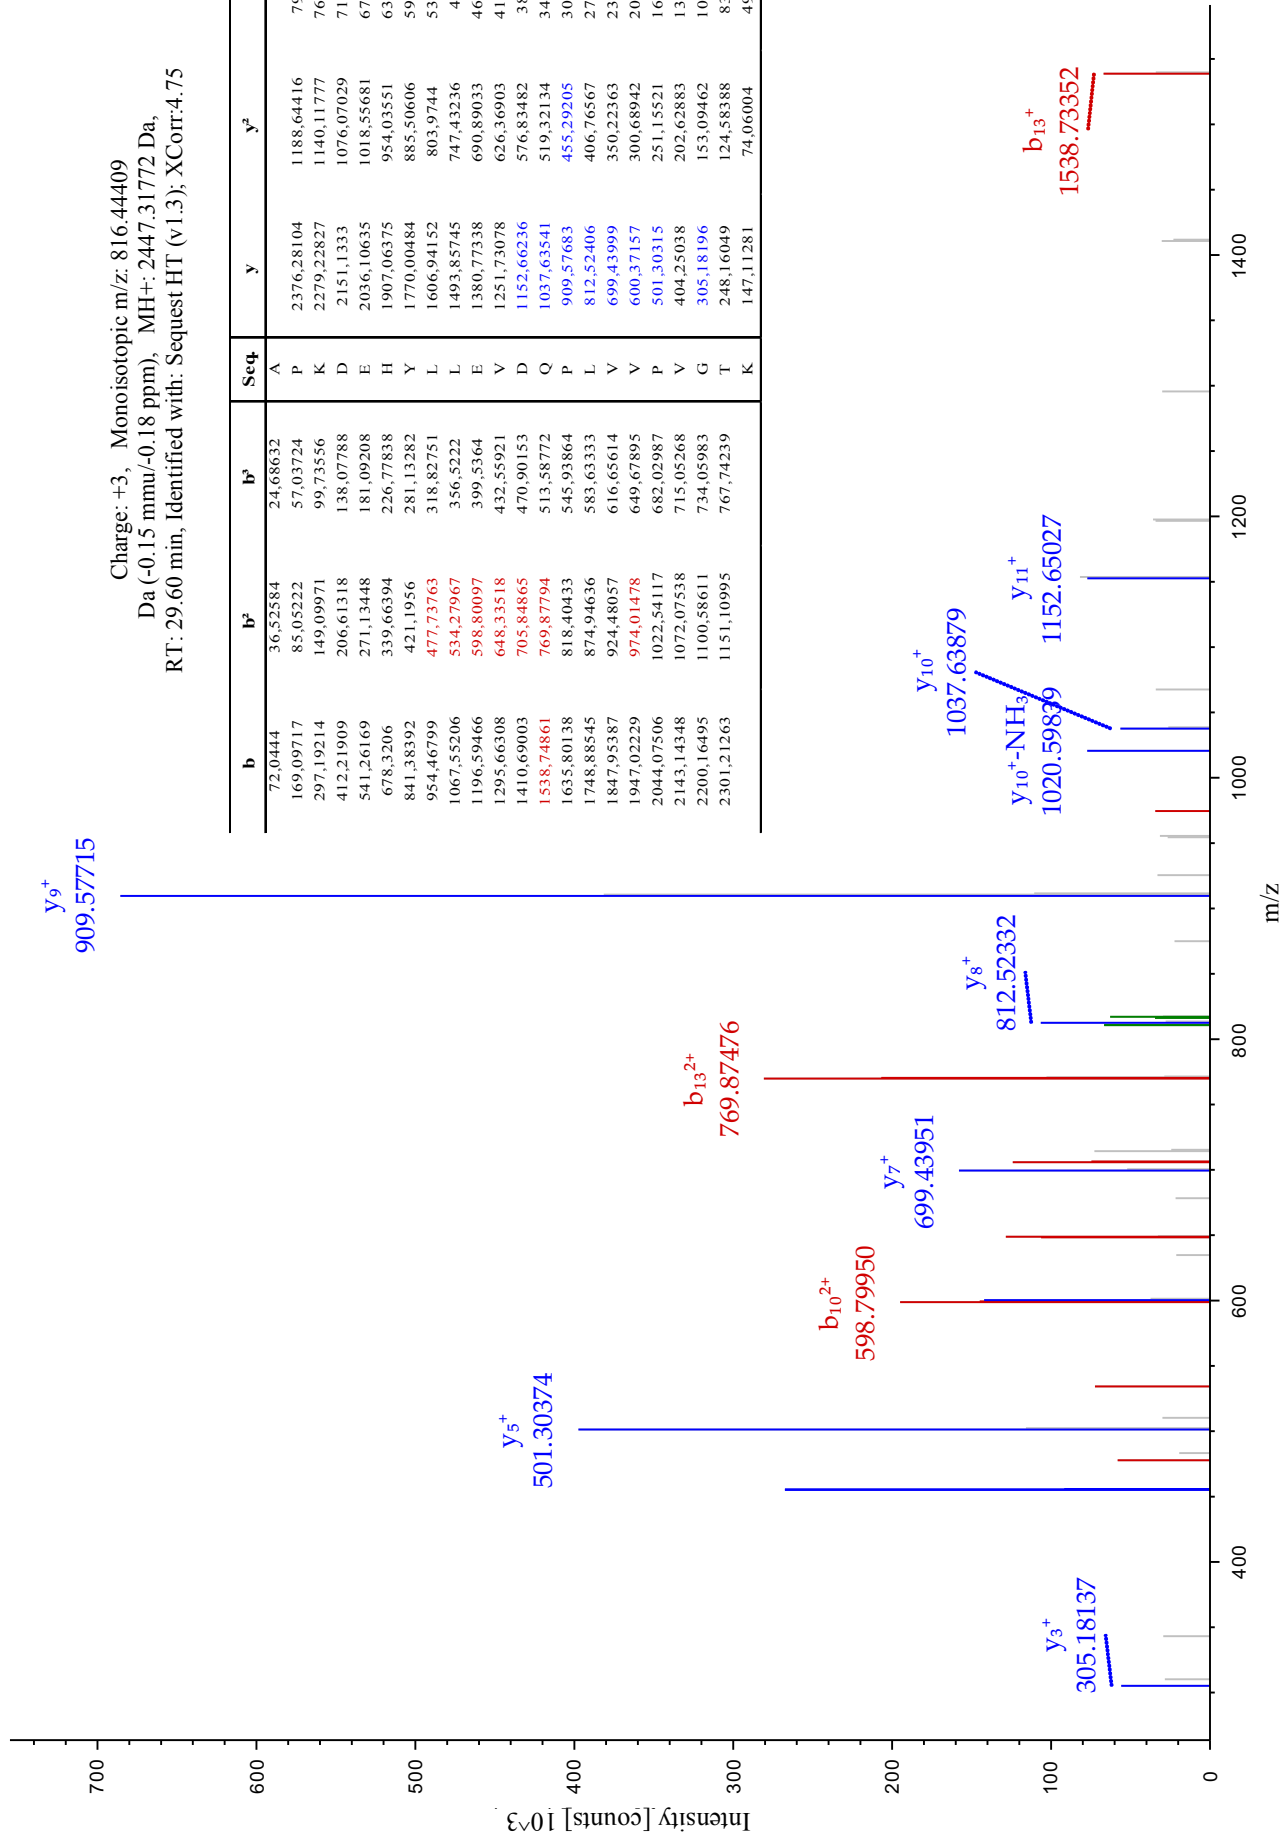

Charge: +3, Monoisotopic m/z: 816.44409  
 Da (-0.15 mmu/-0.18 ppm), MH+: 2447.31772 Da,  
 RT: 29.60 min, Identified with: Sequest HT (v1.3); XCorr: 4.75

| b          | b'         | b'        | Seq | y          | y'         | y'        |
|------------|------------|-----------|-----|------------|------------|-----------|
| 72.0444    | 36.52584   | 24.68632  | A   | 2376.28104 | 1188.64416 | 792.7652  |
| 169.09717  | 85.05222   | 57.03724  | P   | 2279.22827 | 1140.11777 | 760.41427 |
| 297.19214  | 149.09971  | 99.73556  | K   | 2151.1333  | 1076.07029 | 717.71595 |
| 412.21909  | 206.61318  | 138.07788 | D   | 2036.10635 | 1018.55681 | 679.37363 |
| 541.26169  | 271.13448  | 181.09208 | E   | 1907.06375 | 954.03551  | 636.35943 |
| 678.3206   | 339.66394  | 226.77838 | H   | 1770.00484 | 885.50606  | 590.67313 |
| 841.38392  | 421.1956   | 281.13282 | Y   | 1606.94152 | 803.9744   | 536.31869 |
| 954.46799  | 477.73763  | 318.82751 | L   | 1493.85745 | 747.43236  | 498.624   |
| 1067.55206 | 534.27967  | 356.5222  | L   | 1380.77338 | 690.89033  | 460.92931 |
| 1196.59466 | 598.80097  | 399.5364  | E   | 1251.73078 | 626.36903  | 417.91511 |
| 1295.66308 | 648.33518  | 432.55921 | V   | 1152.66236 | 576.83482  | 384.8923  |
| 1410.69003 | 705.84865  | 470.90153 | D   | 1037.63541 | 519.32134  | 346.54999 |
| 1538.74861 | 769.87794  | 513.58772 | Q   | 909.57683  | 455.29205  | 303.86379 |
| 1635.80138 | 818.40433  | 545.93864 | P   | 812.52406  | 406.76567  | 271.51287 |
| 1748.88545 | 874.94636  | 583.63333 | L   | 699.43999  | 350.22363  | 233.81818 |
| 1847.95387 | 924.48057  | 616.65614 | V   | 600.37157  | 300.68942  | 200.79537 |
| 1947.02229 | 974.01478  | 649.67895 | V   | 501.30315  | 251.15521  | 167.77257 |
| 2044.07506 | 1022.54117 | 682.02987 | P   | 404.25038  | 202.62883  | 135.42164 |
| 2143.14348 | 1072.07538 | 715.05268 | V   | 305.18196  | 153.09462  | 102.39884 |
| 2200.16495 | 1100.58611 | 734.05983 | G   | 248.16049  | 124.58388  | 83.39168  |
| 2301.21263 | 1151.10995 | 767.74239 | T   | 147.11281  | 74.06004   | 49.70912  |

**Figure S2:** Solvent excluded surface of *Pp-caa*<sub>3</sub> model structure colored according to the electrostatic potential contoured from -10.0 (intense red) to +10.0 kT/e (intense blue) (where k is the Boltzmann constant, T is the absolute temperature, and *e* is the electron charge). The black circle indicates the conserved region found on the His282 side of SU II haem *c* pocket. The surface on the right panel is rotated by 180° around the vertical axis respect to the surface in the left panel.

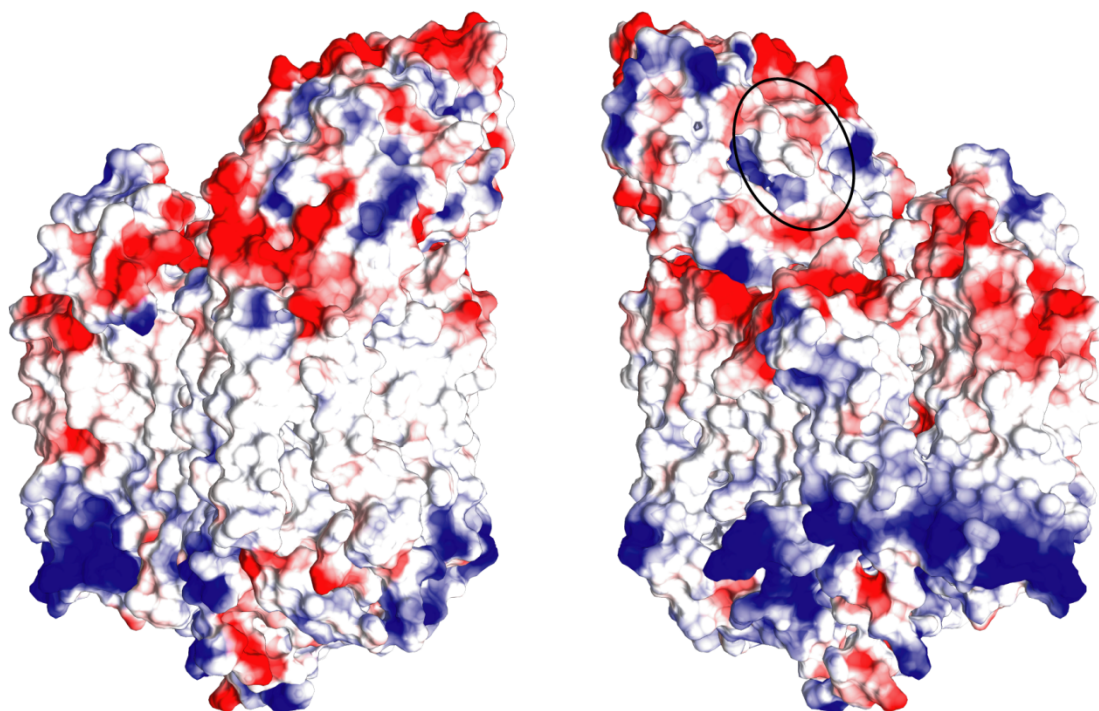

**Figure S3:** Sequence alignment of *Pp-caa3* SU I, IIc and III [*Pp*(I), *Pp*(IIc), and *Pp*(III), respectively] with the corresponding SU from *Pd-aa3* and *Tt-caa3*. The colored secondary structure elements ( $\alpha$ -helix, yellow;  $\beta$ -strand, cyan) are derived from the prediction performed by the PROMALS3D server. Iron and copper binding residues are bordered and colored in red and blue, respectively. Italicized gray residues were not modeled due to the absence of a template for such regions. The linker between SU I and III in *Tt-caa3* is underlined.

### SU I/III Promals3D alignment

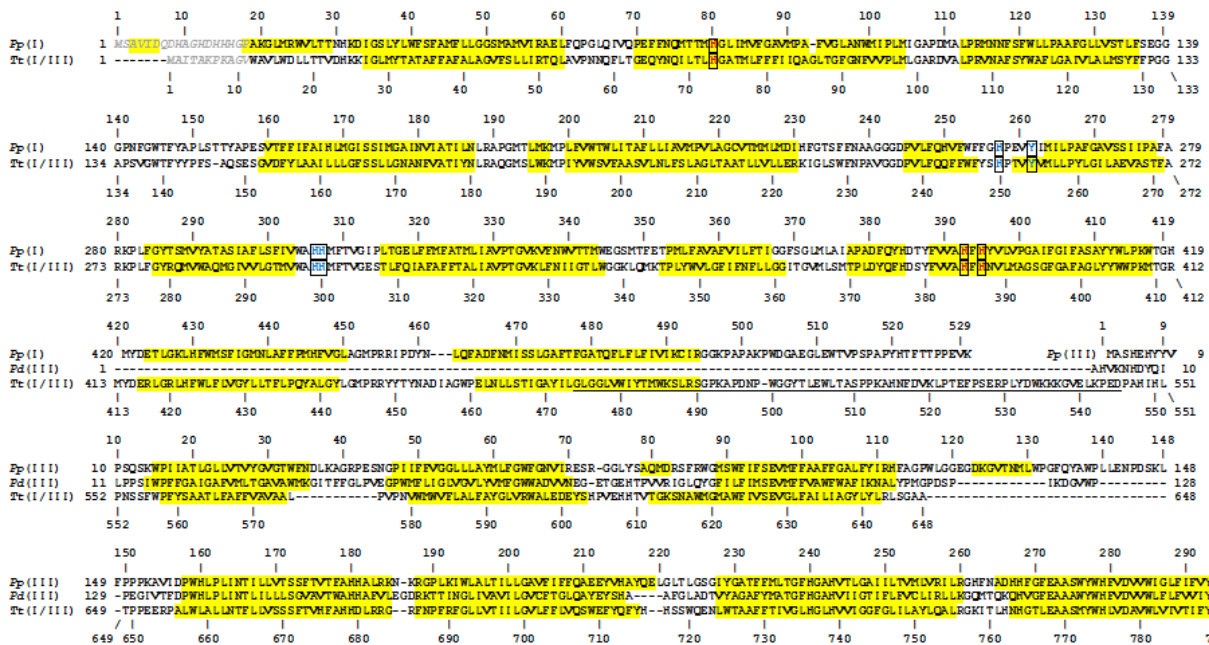

### SU II Promals3D alignment

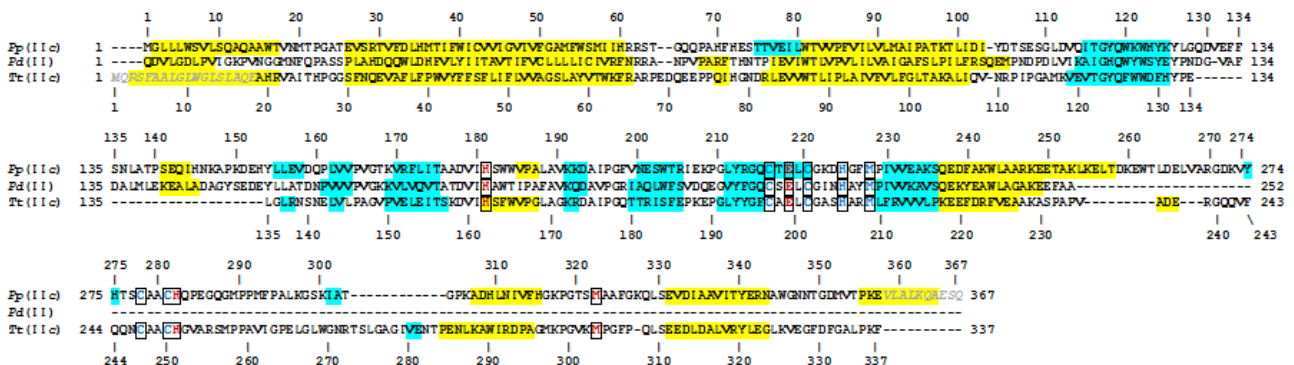

**Table S2:** Nano-LC-MS/MS analysis results for 37 kDa bands extracted from TMBZ gels from W.T. (grown with glucose or biphenyl as sole carbon source). In addition to the information in Table 2 (main manuscript), extracted peak areas for all the detected peptides as well as protein areas for the two bands are shown (Proteome Discoverer 1.4). For one peptide, ADHLNIVFHGKPGTSM\*AAFGK, raw parent peak intensities are also given as an example.

| Accession | Description                                                                                                                                | Σ# Unique Peptides                                             | Σ# PSMs    | Glucose (Band 24)         |                            |                                        |                           | Biphenyl (Band 28) |                                         |                                                           |                           |
|-----------|--------------------------------------------------------------------------------------------------------------------------------------------|----------------------------------------------------------------|------------|---------------------------|----------------------------|----------------------------------------|---------------------------|--------------------|-----------------------------------------|-----------------------------------------------------------|---------------------------|
|           |                                                                                                                                            |                                                                |            | # Peptides Band24         | Σ# Spectral Matches Band24 | Sequest Protein Area Band 24 - Glucose | # Spectral matches Band24 | # Peptides Band28  | Σ# Spectral Matches Band28              | Sequest Protein Area Band 28 - Biphenyl                   | # Spectral matches Band28 |
| L8MR96    | Cytochrome c oxidase subunit 2<br>O5=Pseudomonas pseudoalcaligenes<br>KF707 = NBRC 110670<br>GN=ppKF707_5503 PE=3 SV=1 -<br>[L8MR96_PSEPS] | 14                                                             | 33         | 8                         | 10                         | 8,250E7                                | 13                        | 23                 | 1,879E9                                 |                                                           |                           |
|           | Sequence                                                                                                                                   | Modifications                                                  | MH+ [Da]   | # Spectral matches Band24 | XCorr Band24               | Sequest Peptide Area Band 24 - Glucose | # Spectral matches Band28 | XCorr Band28       | Sequest Peptide Area Band 28 - Biphenyl |                                                           |                           |
|           | DHGFMPWEAK                                                                                                                                 | M5(Oxidation)                                                  | 1358,67716 | 2                         | 3,36                       | 4,122E7                                | 3                         | 3,35               | 1,983E9                                 |                                                           |                           |
|           | DEHYLLEVDQPLVVPVGTK                                                                                                                        |                                                                | 2151,13432 | 2                         | 4,13                       | 3,866E7                                | 2                         | 5,40               | 1,760E9                                 |                                                           |                           |
|           | ADHLNVFHGKPGTSMAAFVK                                                                                                                       | M16(Oxidation)                                                 | 2214,11222 | 1                         | 2,65                       | 3,966E7                                | 2                         | 5,43               | 1,681E9                                 | 7.0E6 = Parent Peak<br>Intensity @ (m/z =<br>554,28, z=4) |                           |
|           | APKDEHYLLEVDQPLVVPVGTK                                                                                                                     |                                                                | 2447,31992 | 1                         | 6,04                       | 1,999E7                                | 2                         | 4,75               | 9,818E8                                 |                                                           |                           |
|           | ELTDKEVTLDELVAR                                                                                                                            |                                                                | 1817,93035 | 1                         | 4,26                       | 1,303E7                                | 2                         | 5,12               | 1,844E9                                 |                                                           |                           |
|           | NAWGNITGDMVTPK                                                                                                                             | M10(Oxidation)                                                 | 1520,67961 | 1                         | 2,19                       | 7,646E6                                | 1                         | 3,23               | 2,259E8                                 |                                                           |                           |
|           | YLGQOVEFFSNLATPSEQIHNK                                                                                                                     |                                                                | 2537,23111 | 1                         | 3,08                       | 7,260E7                                | 1                         | 5,73               | 1,811E9                                 |                                                           |                           |
|           | KDAIPGFVNESWTR                                                                                                                             |                                                                | 1619,81778 |                           |                            |                                        | 2                         | 4,17               | 8,662E8                                 |                                                           |                           |
|           | LKELTDKEVTLDELVAR                                                                                                                          |                                                                | 2059,10703 |                           |                            |                                        | 2                         | 4,16               | 9,672E8                                 |                                                           |                           |
|           | DAIPGFVNESWTR                                                                                                                              |                                                                | 1491,71977 | 1                         | 2,35                       | 1,337E8                                |                           |                    |                                         |                                                           |                           |
|           | GQCTELGK                                                                                                                                   | C3(Carbamidomethyl);<br>C7(Carbamidomethyl)                    | 1052,45012 |                           |                            |                                        | 1                         | 2,18               | 2,522E7                                 |                                                           |                           |
|           | EVLALKQAESEQ                                                                                                                               |                                                                | 1215,65715 |                           |                            |                                        | 1                         | 3,00               | 9,154E6                                 |                                                           |                           |
|           | GQCTELGKDHGFMPWEAK                                                                                                                         | C3(Carbamidomethyl);<br>C7(Carbamidomethyl);<br>M14(Oxidation) | 2392,10904 |                           |                            |                                        | 1                         | 4,10               | 1,651E8                                 |                                                           |                           |
|           | ADHLNVFHGKPGTSMAAFVK                                                                                                                       |                                                                | 2198,11733 |                           |                            |                                        | 1                         | 4,79               | 2,278E8                                 |                                                           |                           |
|           | DHGFMPWEAK                                                                                                                                 |                                                                | 1342,68225 |                           |                            |                                        | 1                         | 3,74               | 1,235E8                                 |                                                           |                           |
|           | EWTLDLVAR                                                                                                                                  |                                                                | 1231,63188 |                           |                            |                                        | 1                         | 2,96               | 8,510E7                                 |                                                           |                           |



**Table S3:** Primers for KF707 deletion mutant strains which were used in this study.

| Target           | Oligo nucleotide sequence (5'→3')                                                                                                                                                        |
|------------------|------------------------------------------------------------------------------------------------------------------------------------------------------------------------------------------|
| $\Delta c_4$     | UPFor ACGTGTAAGCTTCCTTCACAGTTATTCGGCGCA<br>UPRev AGGAGTAAGTATGGAACAGTAGCGGCGGTGGATGATCATC<br>DOWNFor ACTGTTCCATACTTACTCCTACCCAAGGCGGTGATCGAT<br>DOWNRev ATTCGAATTCTCTCGTCCAGCCGCGCTAAAG  |
| $\Delta c_5$     | UPFor CGGGCTGGATCCGCGAGACCC<br>UPRev ACATTGATCTTAATTGTACCTTCAGCCGGGAGCCGTCCG<br>DOWNFor AGGTACAATTAAGATCAATGTCCTGCTTCCTCACC GGCTA<br>DOWNRev ATCCCGAATTCTCACTCCCCTGCGCTACCAC             |
| $\Delta c_4/c_5$ | UPFor ATTAGTGGATCCAAGAGGACGGGGCGACGCAG<br>UPRev TAGGAGTCAGAATGGTTCAGTTAGGGGTTCCACGGTTAAT<br>DOWNFor ACTGAACCATTCTGACTCCTAAAGTAACACCCCTGCCTGC<br>DOWNRev GGGCTGAATTCGATGTAGAACTTGCGCTCGGG |

**Figure S4:** Cox activity in KF707 wild type (W.T.) and cyt  $c_4$  or  $c_5$  deletion strains (Table 1), visualized as a blue color using NADI staining (Marrs and Gest, 1973). The staining was performed after overnight growth on LB plates with 3 mL of a 1:1 mixture of 35 mM  $\alpha$ -naphthol and 30 mM N,N-dimethyl-*p*-phenylenediamine (DMPD) dissolved in ethanol and water, respectively (Materials and Methods).

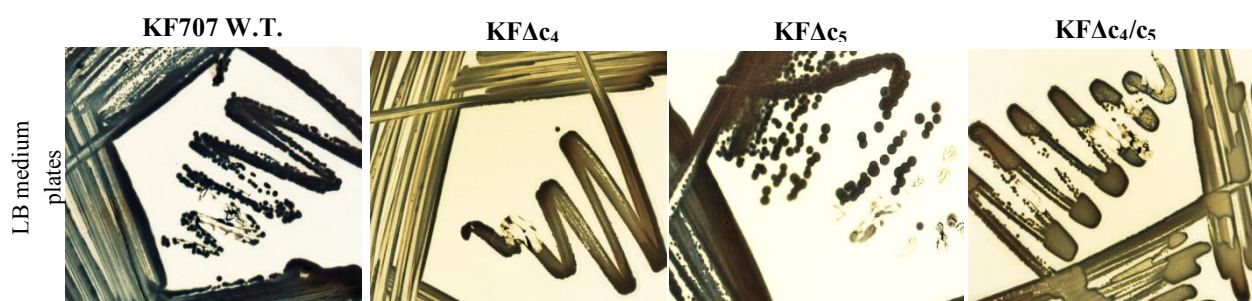

Supplement: NIHMS940803-supplement-Supp_infoS1.pdf [file NIHMS940803-supplement-Supp_infoS1.pdf]
